# Supplementary material for: Living Material with Temperature‐Dependent Light Absorption
Source: PubMed Central journal article supplement (PMC10602556; doi:10.1002/advs.202301730), 2023-09-15
Supplement: ADVS-10-2301730-s001.pdf [file ADVS-10-2301730-s001.pdf]

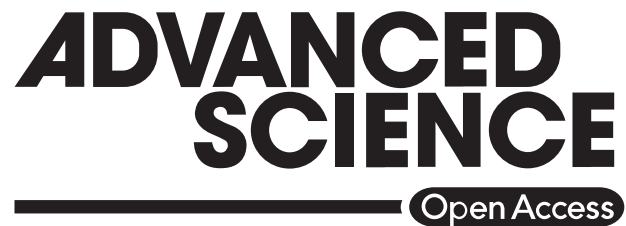

## Supporting Information

for *Adv. Sci.*, DOI 10.1002/adv.202301730

Living Material with Temperature-Dependent Light Absorption

*Lealia L. Xiong, Michael A. Garrett, Julia A. Kornfield\* and Mikhail G. Shapiro\**

# Supporting information

## ***Living material with temperature-dependent light absorption***

Lealia L. Xiong<sup>1</sup>, Michael A. Garrett<sup>2</sup>, Julia A. Kornfield<sup>2,\*</sup>, Mikhail G. Shapiro<sup>2,3,\*</sup>

<sup>1</sup> Division of Engineering and Applied Sciences

<sup>2</sup> Division of Chemistry and Chemical Engineering

<sup>3</sup> Howard Hughes Medical Institute

California Institute of Technology

Pasadena, CA USA 91125

\* Correspondence should be addressed to MGS and JAK: [mikhail@caltech.edu](mailto:mikhail@caltech.edu), [jak@cheme.caltech.edu](mailto:jak@cheme.caltech.edu)

## **Table of contents**

Supplementary Tables S1-S2

Supplementary Figures S1-S12

## SUPPLEMENTARY TABLES S1-S2

**Supplementary Table S1.** Genetic constructs used in this study.

| <b>Plasmid</b>         | <b>Purpose</b>      | <b>Transcriptional Regulator(s)</b> | <b>Output Gene Product(s)</b> |
|------------------------|---------------------|-------------------------------------|-------------------------------|
| pTSwitch-LacZ $\alpha$ | temperature switch  | TlpA36, CI                          | LacZ $\alpha$ , mWasabi       |
| pTlpA36-wasabi         | unpigmented control | TlpA36                              | mWasabi                       |
| pTrcLacZ $\alpha$      | pigmented control   | LacIq                               | LacZ $\alpha$                 |

**Supplementary Table S2.** Sequences of DNA parts used in this study.

| Type               | Name           | Sequence                                                                                                                                                                                                                                                                                                                                                                                                                                                                                                                                                                                                                                                                                                                                                                                                                                                                                                                                                                                                                                                                                                                                                                                                                               |
|--------------------|----------------|----------------------------------------------------------------------------------------------------------------------------------------------------------------------------------------------------------------------------------------------------------------------------------------------------------------------------------------------------------------------------------------------------------------------------------------------------------------------------------------------------------------------------------------------------------------------------------------------------------------------------------------------------------------------------------------------------------------------------------------------------------------------------------------------------------------------------------------------------------------------------------------------------------------------------------------------------------------------------------------------------------------------------------------------------------------------------------------------------------------------------------------------------------------------------------------------------------------------------------------|
| promoter           | PTlpA          | TTTAATTTGTTTGTAGTTAGTTTATTTGTTGGTTTGTGGTTGTTATA<br>ATAT                                                                                                                                                                                                                                                                                                                                                                                                                                                                                                                                                                                                                                                                                                                                                                                                                                                                                                                                                                                                                                                                                                                                                                                |
| promoter           | PR             | GTGCGTGTGACTATTTTACCTCTGGCGGTGATAATGGTTGCATGTACTAAG<br>GAGGTTG                                                                                                                                                                                                                                                                                                                                                                                                                                                                                                                                                                                                                                                                                                                                                                                                                                                                                                                                                                                                                                                                                                                                                                         |
| promoter           | PL             | AACCATCTGCGGTGATAAATTATCTCTGGCGGTGTTGACATAAATACCACTG<br>GCGGTGATACTGAGCACATCAGCAGG                                                                                                                                                                                                                                                                                                                                                                                                                                                                                                                                                                                                                                                                                                                                                                                                                                                                                                                                                                                                                                                                                                                                                     |
| promoter           | PTrc           | TTGACAATTAATCATCCGGCTCGTATAATGTGTGGAATTGTGAGCGGATAAC<br>AATT                                                                                                                                                                                                                                                                                                                                                                                                                                                                                                                                                                                                                                                                                                                                                                                                                                                                                                                                                                                                                                                                                                                                                                           |
| degradation<br>tag | AAV ssrA tag   | GCTGCTAACGACGAAAACACTACGCTGACGCTTCT                                                                                                                                                                                                                                                                                                                                                                                                                                                                                                                                                                                                                                                                                                                                                                                                                                                                                                                                                                                                                                                                                                                                                                                                    |
| terminator         | T7             | CTAGCATAACCCCTTGGGGCCTCTAACGGGTCTTGAGGGGTTTTTTG                                                                                                                                                                                                                                                                                                                                                                                                                                                                                                                                                                                                                                                                                                                                                                                                                                                                                                                                                                                                                                                                                                                                                                                        |
| terminator         | Part:BBa_B1002 | CGCAAAAACCCCGCTTCGGCGGGGTTTTTTCGC                                                                                                                                                                                                                                                                                                                                                                                                                                                                                                                                                                                                                                                                                                                                                                                                                                                                                                                                                                                                                                                                                                                                                                                                      |
| RBS                | RBSF           | CACCATACACTG                                                                                                                                                                                                                                                                                                                                                                                                                                                                                                                                                                                                                                                                                                                                                                                                                                                                                                                                                                                                                                                                                                                                                                                                                           |
| gene               | LacZa          | CATGATTACGGATTCACTGGCCGTCGTTTTACAACGTCGTGACTGGGAAAAC<br>CCTGGCGTTACCAACTTAATCGCCTTGCAGCACATCCCCCTTCGCCAGCT<br>GGCGTAATAGCGAAGAGGGCCCGCACCGATCGCCCTTCCCAACAGTTGCGCA<br>GCCTGAATGGCGAATGGCGCTTTGCCTGGTTCCGGCACCCAGAAGCGGTGC<br>CGGAAAGCTGGCTGGAG                                                                                                                                                                                                                                                                                                                                                                                                                                                                                                                                                                                                                                                                                                                                                                                                                                                                                                                                                                                         |
| gene               | mWasabi        | ATGGTGAGCAAGGGCGAGGAGACCACAATGGGGCTAATCAAGCCCGACATG<br>AAGATCAAGCTGAAGATGGAGGGCAACGTGAATGGCCACGCTTCGTGATCG<br>AGGGCGAGGGCGAGGGCAAGCCCTACGACGGCACCAACACCATCAACCTGG<br>AGGTGAAGGAGGGAGCCCCCTGCCCTTCTCCTACGACATTTGACCACCGG<br>GTTTCAGTTACGGCAACAGGGCCTTACCAAGTACCCGACGACATCCCCAAC<br>TACTTCAAGCAGTCTTCCCGAGGGCTACTCTTGGGAGCGCACCATGACCT<br>TCGAGGACAAGGGCATCGTGAAGGTGAAGTCCGACATCTCCATGGAGGAGG<br>ACTCCTTCACTACGAGATACACCTCAAGGGCGAGAACCTCCCCCACAACGG<br>CCCCGTGATGCAGAAGGAGACCACCGGCTGGGACGCCCTCCACCGAGAGGAT<br>GTACGTGCGCGACGGCGTGTGAAGGGCGACGTCAAGATGAAGCTGCTGCT<br>GGAGGGCGCGCCACCACCGCTTGAAGTCAAGACCATCTACAGGGCCAA<br>GAAGGGCGTGAAGCTGCCCGACTATCACTTTGTGGAACCCGTCATCGAGATC<br>CTGAACCACGACAAGGACTACAACAAGGTGACCGTTTACGAGATCGCCGTGG<br>CCCGCAACTCCACCGACGGCATGGACGAGCTGTACAAGGGC                                                                                                                                                                                                                                                                                                                                                                                                                                                      |
| gene               | TlpA36         | ATGCGTCCGGCGACATACGAACCAGAACAGATTATTGAAGCAGGGCTGGCCC<br>TGCAGGCTGAAGGACGGAATATCACCGGGTTTCGCACTACGTAACCAGTGG<br>GTGGCGGCAATCCGACAGTCTCCGCCAGATATGGGACGAATAACAGGCTT<br>CACAGAGCACGGTCGTCACTGAACTCGTTGCCGAGCTGCCAGTGGAAAGTGG<br>CTGAAGAAGTGAAGGCCGTCTCCGCCGCGCTGTCCGAACGCATCACCCAGC<br>TGGCGACAGAACTGAATGACAAGGCGGTCCGGGCTGCAGAACGCCGGGTTG<br>CGGAAGTCACGCGTGTGCCGGTGAACAGACCCGCACAGGCAGAGCGGGAGC<br>TGGCCGACGCCGCGCAGACAGTGCAGCAGCTGGAAGAAAACTGGTTGAACT<br>GCAGGACAGATATGACAGTTTGACGCTGGCGCTGGAGTCAGAACGTTCACT<br>CGCTCAGCAGCATGATGTGGAGATGGCCCAGCTGAAAGAGCGTCTTGGCGG<br>CGCTGAAGAGAATAACCGTCAGCGAGAGGAACGGTATCAGGAGCAGAGGAC<br>AGTGCTGCAGGATGCGCTTAATGCGGAGCAGGCACAGCACATAAACACGCG<br>GGAAGACCAGCAGAAACGACTGGAGCAAATTTCTGCCGAAGCTAATGCGCGT<br>ACAGAAGAAGTGAAGTCTGAACCGGATAAAGTCAATACTCTCCTTACCCGCC<br>TTGAATCGCAGGAAAATGCGCTGGCCTCAGAACGTGAGCAGCATCTGGCCAC<br>CCGCGAAACGCTGCAGCAACGCCTCGAGCAGGCCATCGCTGACACGCAGGC<br>GCGCGCCGGTGAAGTTGACTTGAACGTGACAGAGTCAGCAGCCTCACCCG<br>AAGGCTGGAATCGCAGGAAAAGGCCTCCTCGGAGCAACTGGTGGCCTATGGG<br>CAGTGAATAGCCAGTCTGACAGAGCGTTGCACAGCTGGAAAACAGCGGT<br>GATGATGCCCGTCTGAGACGATGGGGGAGAAAACCGTCCGCCGCACTG<br>CGTGGTGAAGCTGAAGCCCTGAAGCGTCAGAACCAGTCACTGATGGCGGG<br>CTTTCAGGCAATAAACAGACCGGTGGCCAGAATGCGT |

|      |    |                                                                                                                                                                                                                                                                                                                                                                                                                                                                                                                                                                                                                                                                                                                                                                                          |
|------|----|------------------------------------------------------------------------------------------------------------------------------------------------------------------------------------------------------------------------------------------------------------------------------------------------------------------------------------------------------------------------------------------------------------------------------------------------------------------------------------------------------------------------------------------------------------------------------------------------------------------------------------------------------------------------------------------------------------------------------------------------------------------------------------------|
| gene | CI | ATGAGCACAAAAAAGAAACCATTAACACAAGAGCAGCTTGAGGACGCACGTC<br>GCCTTAAAGCAATTTATGAAAAAAGAAAAATGAACTTGGCTTATCCCAGGAA<br>TCTGTCGCAGACAAGATGGGGATGGGGCAGTCAGGCCGTTGGTGCCTTATTT<br>AATGGCATCAATGCATTAATGCTTATAACGCCGATTGCTTGCAAAAATTCT<br>CAAAGTTAGCGTTGAAGAATTTAGCCCTTCAATCGCCAGAGAAATCTACGAG<br>ATGTATGAAGCGGTTAGTATGCAGCCGTCACTTAGAAGTGAGTATGAGTACC<br>CTGTTTTTCTCATGTTTCAGGCAGGGATGTTCTCACCTGAGCTTAGAACCTT<br>TACCAAAGGTGATGCGGAGAGATGGGTAAGCACACCAAAAAAGCCAGTGAT<br>TCTGCATTCTGGCTTGAGGTTGAAGGTAATCCATGACCGCACCAACAGGCT<br>CCAAGCCAAGCTTTCCTGACGGAATGTTAATTCTCGTTGACCCTGAGCAGGC<br>TGTTGAGCCAGGTGATTTCTGCATAGCCAGACTTGGGGGTGATGAGTTTAC<br>CTTCAAGAACTGATCAGGGATAGCGGTCAGGTGTTTTTACAACCACTAAAC<br>CCACAGTACCCAATGATCCCATGCAATGAGAGTTGTTCCGTTGTGGGAAAG<br>TTATCGCTAGTCAGTGGCCTGAAGAGACGTTTGGCTGA |
|------|----|------------------------------------------------------------------------------------------------------------------------------------------------------------------------------------------------------------------------------------------------------------------------------------------------------------------------------------------------------------------------------------------------------------------------------------------------------------------------------------------------------------------------------------------------------------------------------------------------------------------------------------------------------------------------------------------------------------------------------------------------------------------------------------------|

**SUPPLEMENTARY FIGURES S1-S11**

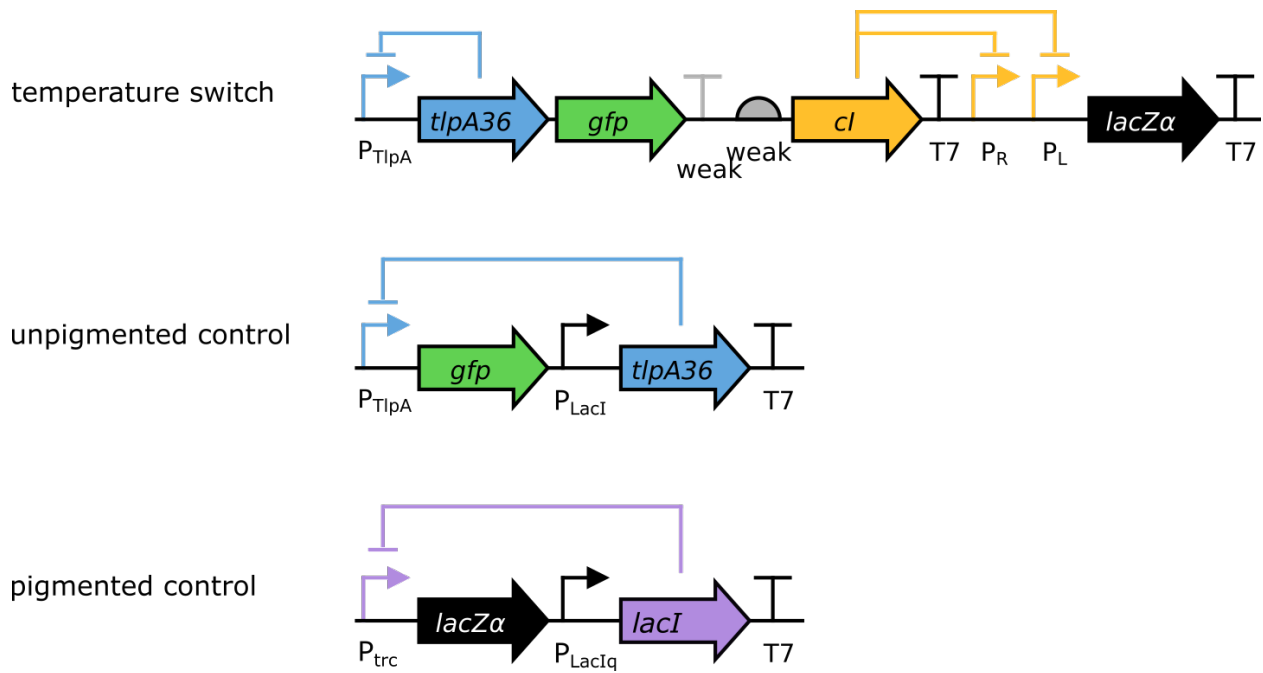

**Supplementary figure S1.** Circuit diagrams of temperature switch construct for low-temperature pigmentation, unpigmented control, and pigmented control. The unpigmented control construct encodes mWasabi green fluorescent protein (GFP) under the control of TIpA36. Below 36°C, TIpA36 represses the expression of GFP by binding to the  $P_{TIpA}$  promoter. Above 36°C, TIpA36 loses repressor function, so GFP is expressed from the  $P_{TIpA}$  promoter. The pigmented control construct encodes LacZα peptide under the control of the *lac* repressor (LacI). LacI represses the expression of LacZα by binding to the  $P_{trc}$  promoter. Isopropyl β-D-1-thiogalactopyranoside (IPTG) binds to LacI and causes an allosteric change in its shape, causing LacI to lose its ability to bind to the  $P_{trc}$  promoter. Thus, IPTG induces the expression of LacZα from this construct.

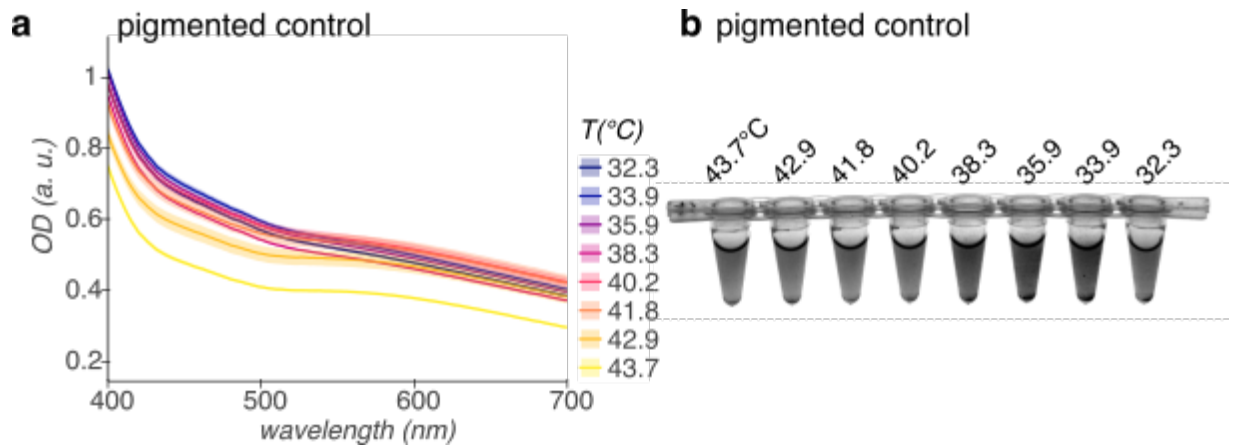

**Supplementary figure S2.** Visible light optical density (OD) spectra (**a**) and representative white light transillumination image (**b**) of cultures of *E. coli* containing a pigmented control construct encoding IPTG-inducible LacZ $\alpha$  after 24 h growth in pigment-induction media at temperatures ranging from 43.7°C to 32.3°C.  $n = 2$  biological replicates; shading represents +/- standard error of the mean.

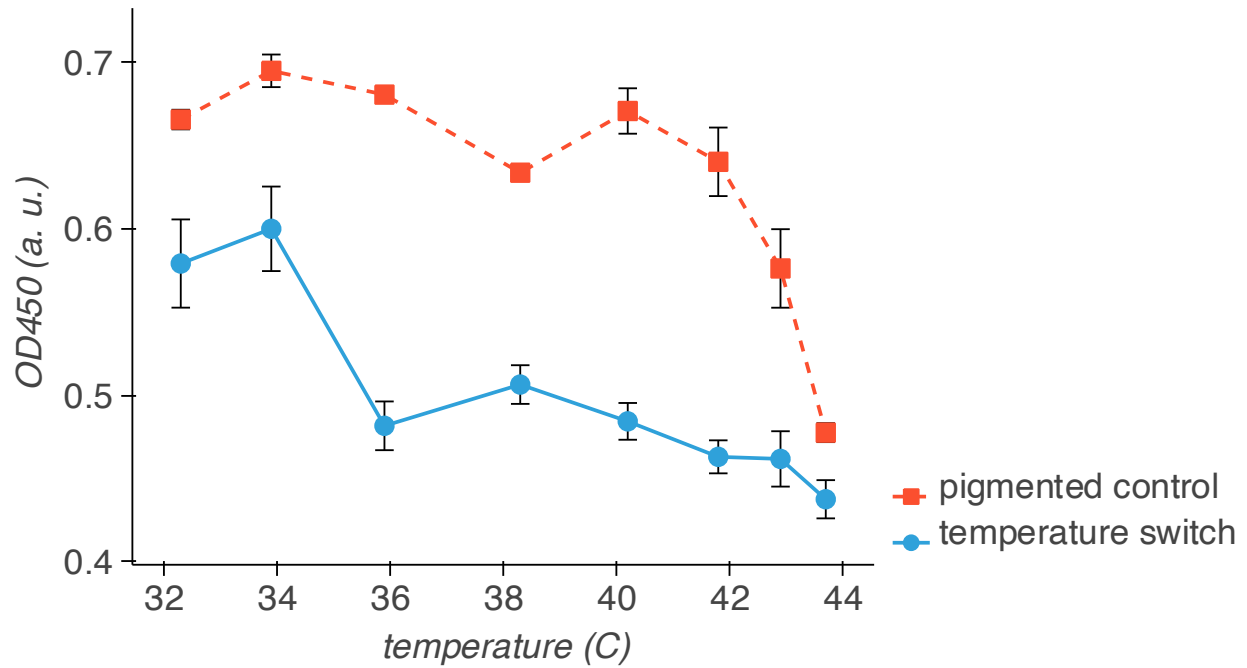

**Supplementary figure S3.** Optical density at 450 nm of cultures of *E. coli* containing the temperature switch construct ( $n = 4$ ) or the pigmented control construct encoding IPTG-inducible LacZ $\alpha$  ( $n = 2$ ) after 24 h growth in pigment-induction media at temperatures ranging from 43.7°C to 32.3°C. 450 nm is within the visible light spectrum, but avoids the maximum excitation wavelength of mWasabi, 493 nm.



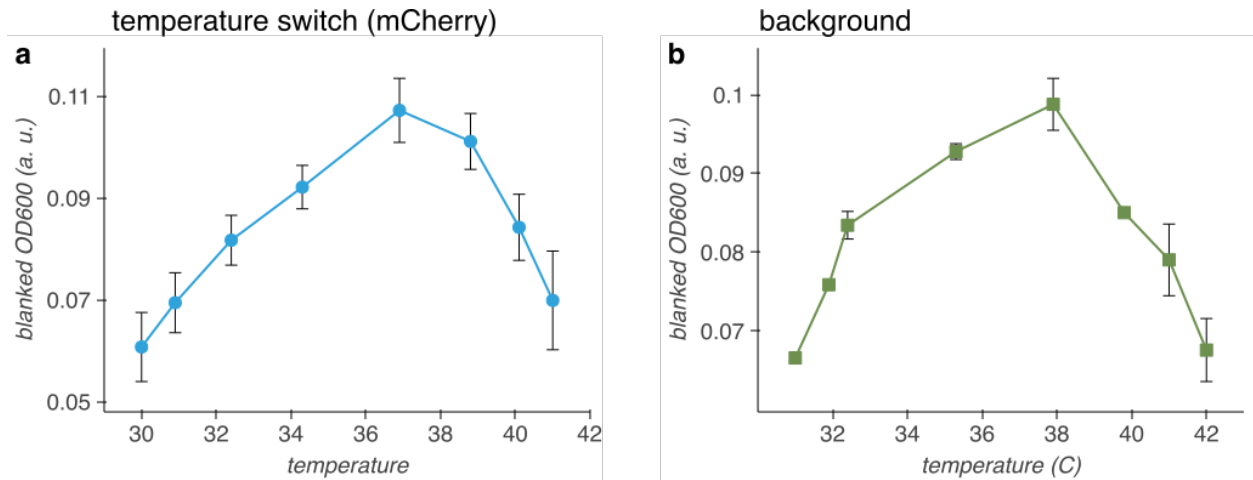

**Supplementary figure S4.** Cell density of *E. coli* grown for 12 hours at temperatures ranging from 31°C to 42°C, measured by optical density at 600 nm (OD600). **(a)** OD600 of cultures of DH10B *E. coli* containing a variant of the temperature switch circuit wherein *mCherry* replaces *lacZ* $\alpha$ .  $n = 4$  biological replicates; error bars represent +/- standard error of the mean. **(b)** OD600 of cultures of DH10B *E. coli* containing a construct encoding a nonfluorescent mutant of mWasabi (S71T, G73A) under the control of TlpA. At these temperatures, TlpA is always functional, repressing the expression of the nonfluorescent mWasabi.  $n = 2$  biological replicates; error bars represent +/- standard error of the mean.

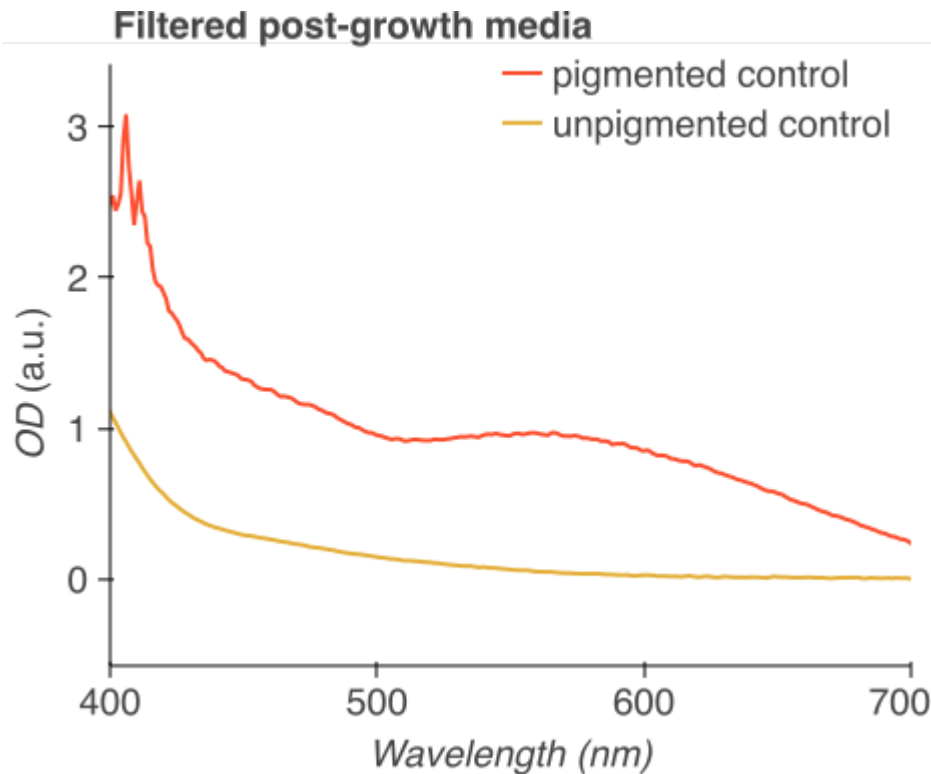

**Supplementary figure S5.** Visible light optical density (OD) spectra of media from *E. coli* cultures grown for 23 h at 30°C, 250 rpm with 300 µg/mL S-gal, 1 h after removing cells by passing through a 0.22 µm filter and adding 500 µg/mL ferric ammonium citrate. Black pigment forms visibly in media from *E. coli* containing a pigmented control circuit, resulting in increased optical density from 450 nm to 700 nm compared with media from *E. coli* containing an unpigmented control circuit. Spectra measured using a NanoDrop 2000/2000c Spectrophotometer (ThermoFisher) in cuvette mode. Constructs differ from main text slightly: Unpigmented control encodes nonfluorescent mWasabi mutant under the control of TlpA (TlpA represses product at 30°C). Pigmented control encodes IPTG-inducible full-length LacZ. Temperature switch construct lacks AAV ssrA tag on LacZ $\alpha$ .

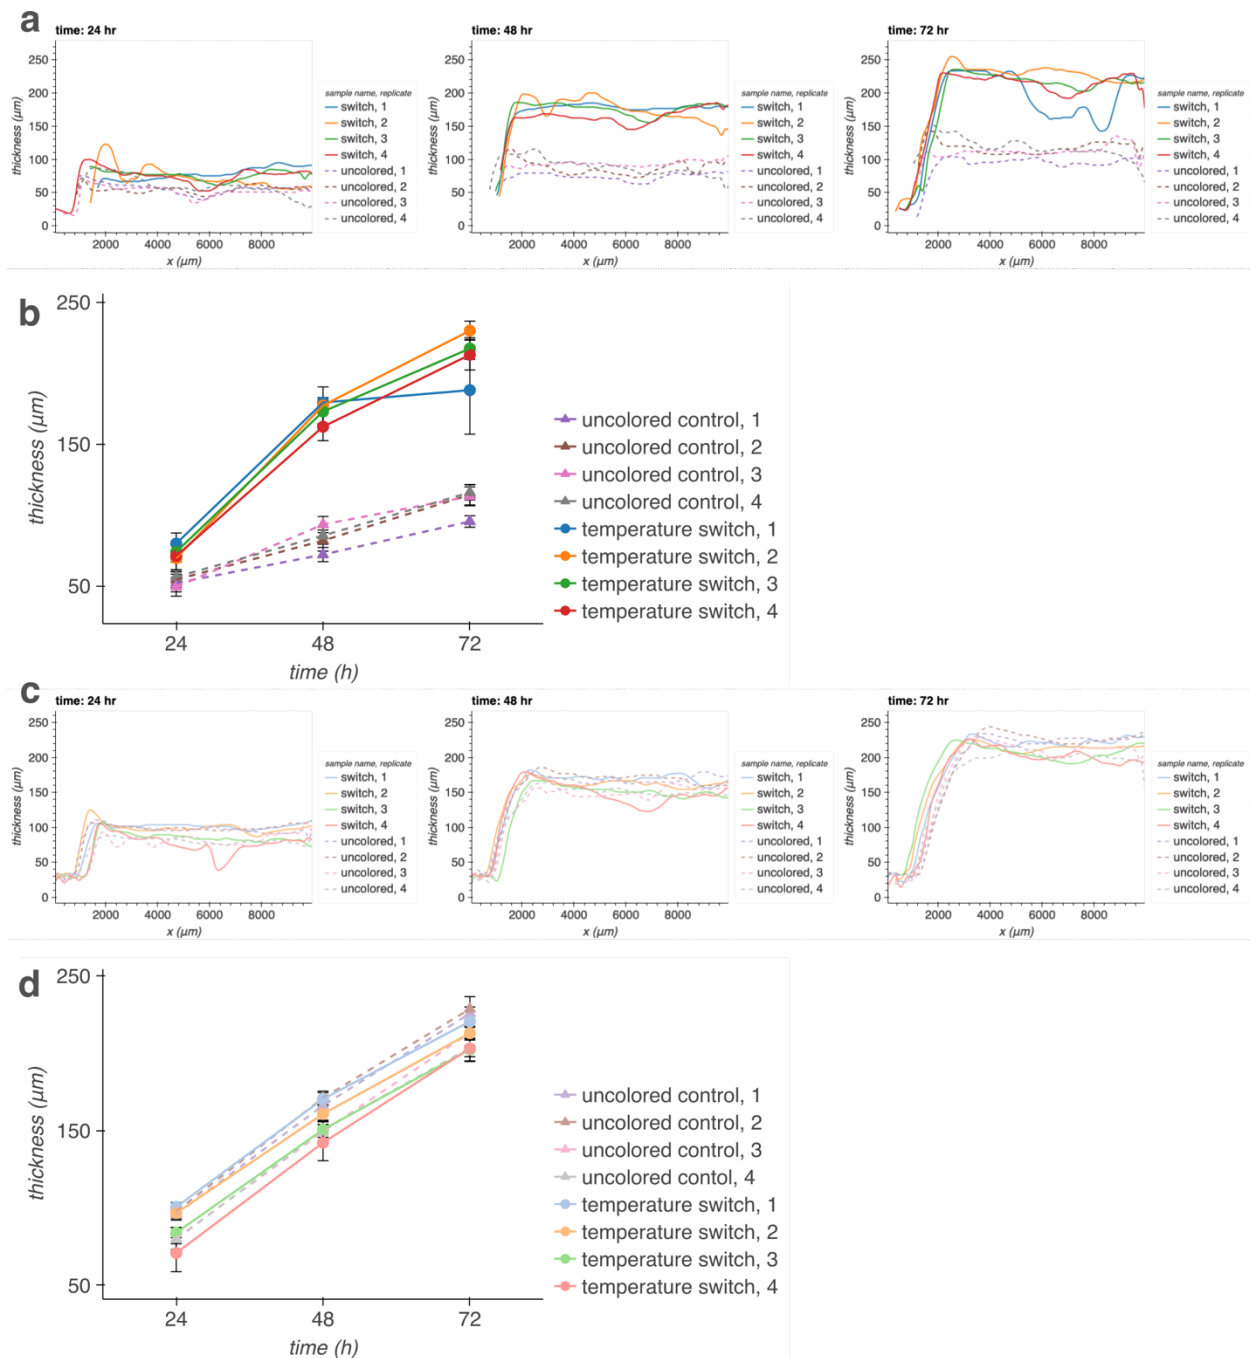

**Supplementary figure S6.** (a, c) Thicknesses over time measured across full OCT cross-section for each patch of *E. coli* containing either the temperature switch construct or an unpigmented control construct encoding heat-inducible GFP, grown at 32°C with (a) or without (c) illumination. (b, d) Mean thickness and standard deviation between  $x = 3.5$  mm and  $x = 9.0$  mm (avoiding the edges of the patch) of each patch, grown with (b) or without (d) illumination over time.

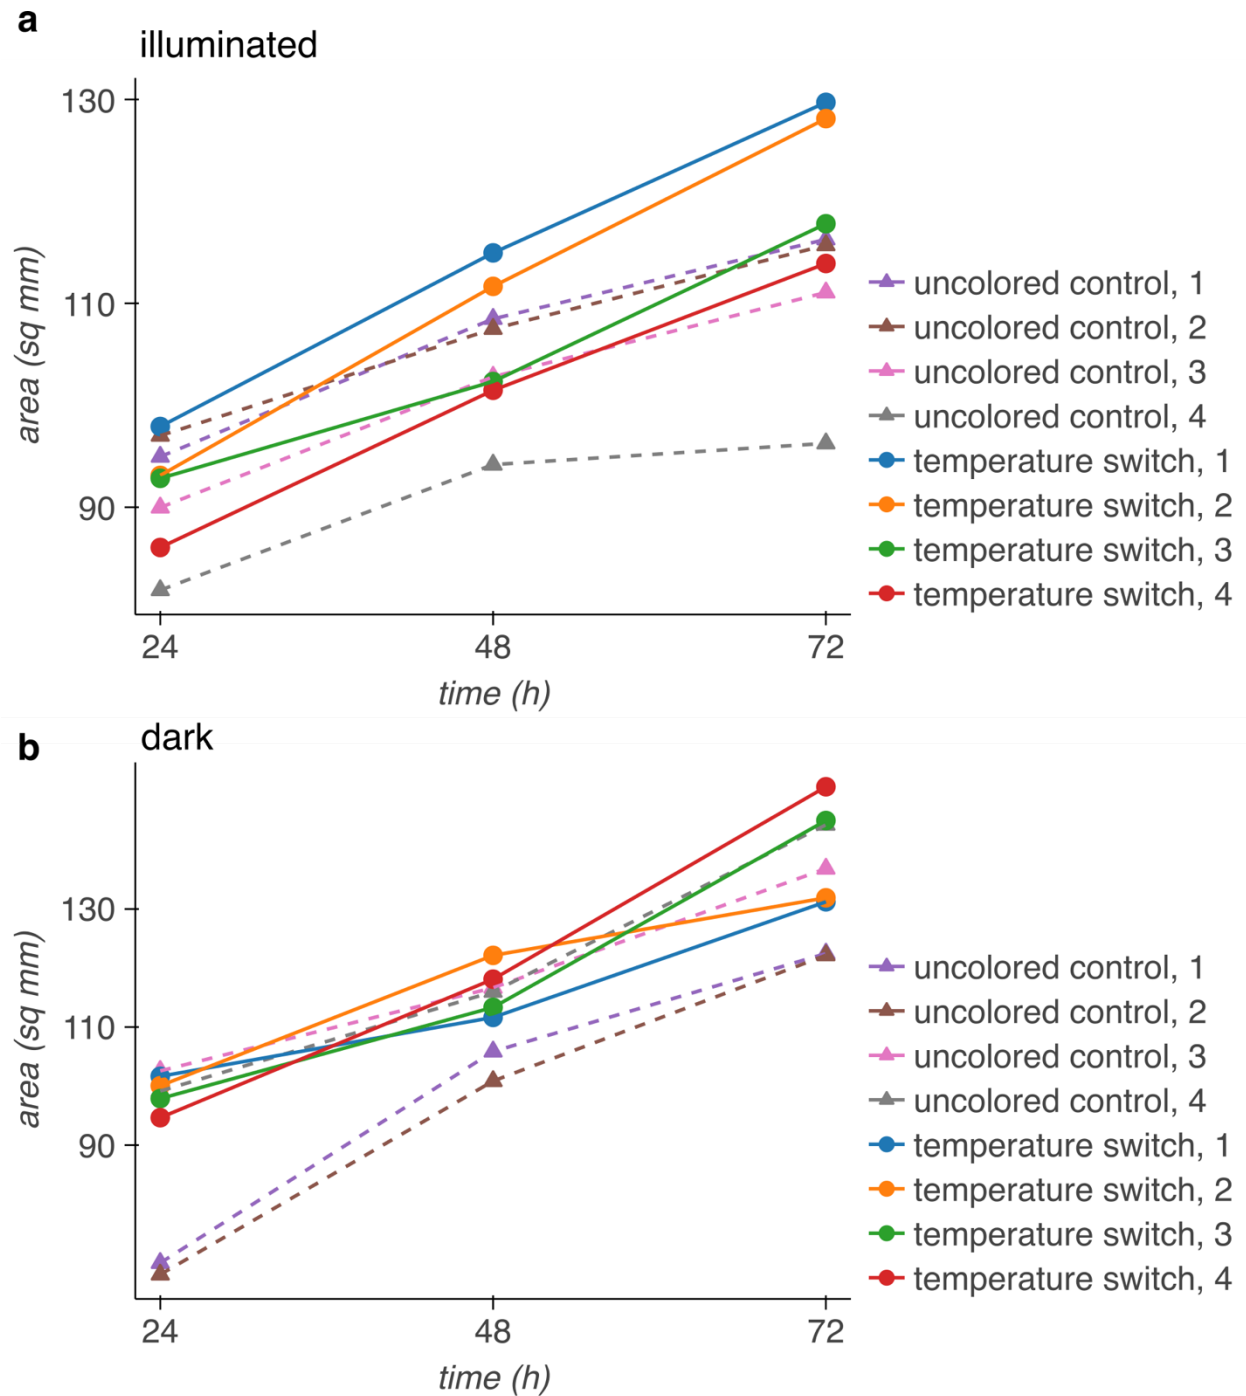

**Supplementary figure S7.** Area of patches of *E. coli* containing either the temperature switch construct or an unpigmented control construct encoding heat-inducible GFP, grown at 32°C with (a) or without (b) illumination over time.

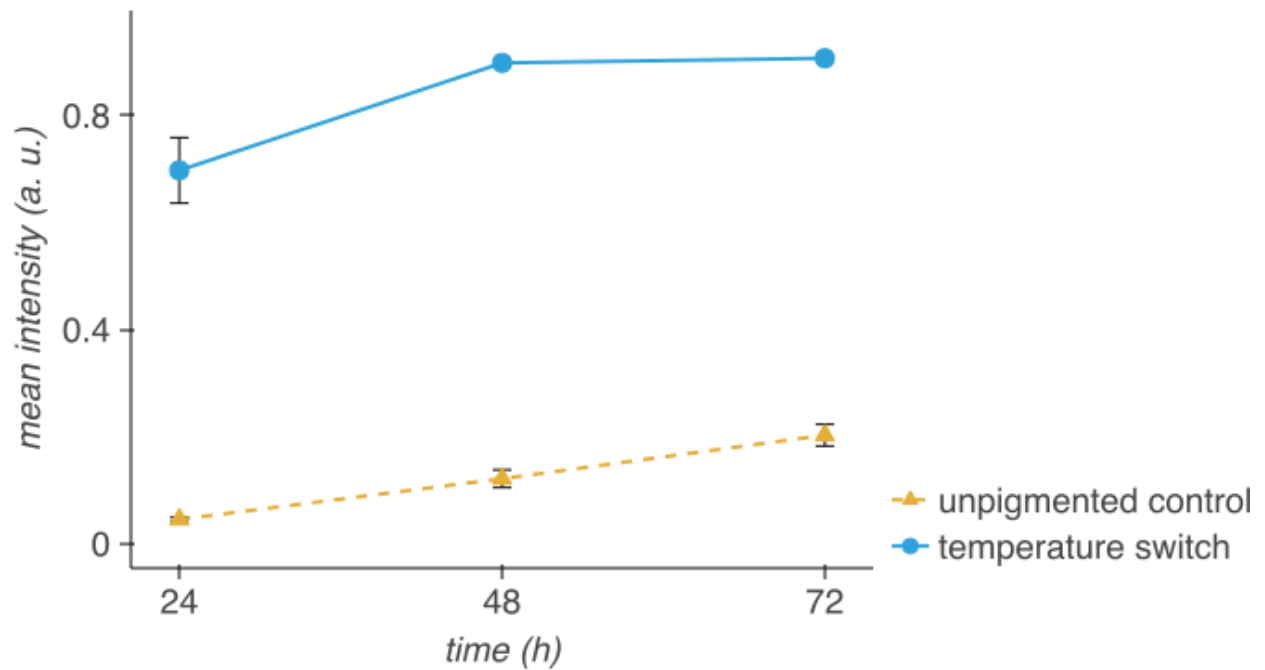

**Supplementary figure S8.** Mean pixel intensity of patches of *E. coli* containing either the temperature switch construct or an unpigmented control construct encoding heat-inducible GFP, grown at 32°C under illumination, over time. Data was quantified from a series of transillumination. Images were normalized so that the polycarbonate membranes have a mean intensity of 0 and opaque black plastic has a mean intensity of 1.  $n = 4$  biological replicates; error bars represent +/- standard error of the mean.

32°C

temperature switch

unpigmented control

24 h

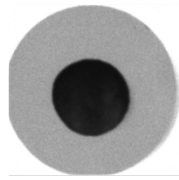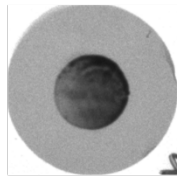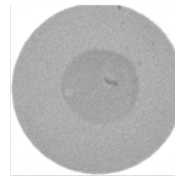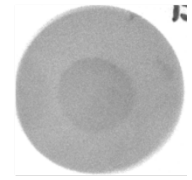

48 h

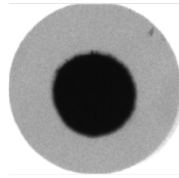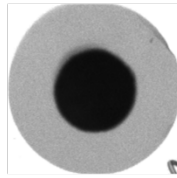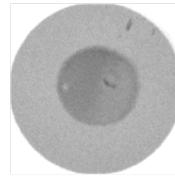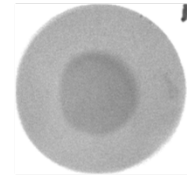

72 h

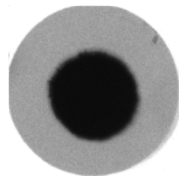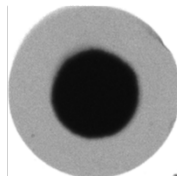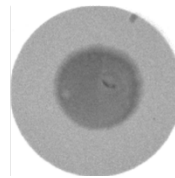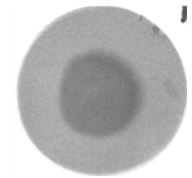

**Supplementary figure S9.** Representative transillumination white light images of patches of *E. coli* containing the temperature switch construct or the unpigmented control construct on polycarbonate membranes after 24 h, 48 h, and 72 h of growth in the illuminated growth chamber with pigment-induction media at 32°C.

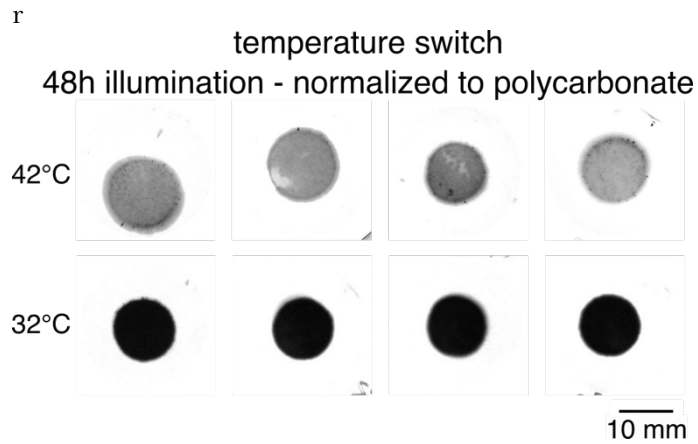

**Supplementary figure S10.** Transillumination white light images of patches of *E. coli* containing the temperature switch construct on polycarbonate membranes after 48 h growth in the illuminated growth chamber with pigment-induction media at 42°C and 32°C, normalized so that the polycarbonate membranes have a mean intensity of 0 and opaque black plastic has a mean intensity of 1.

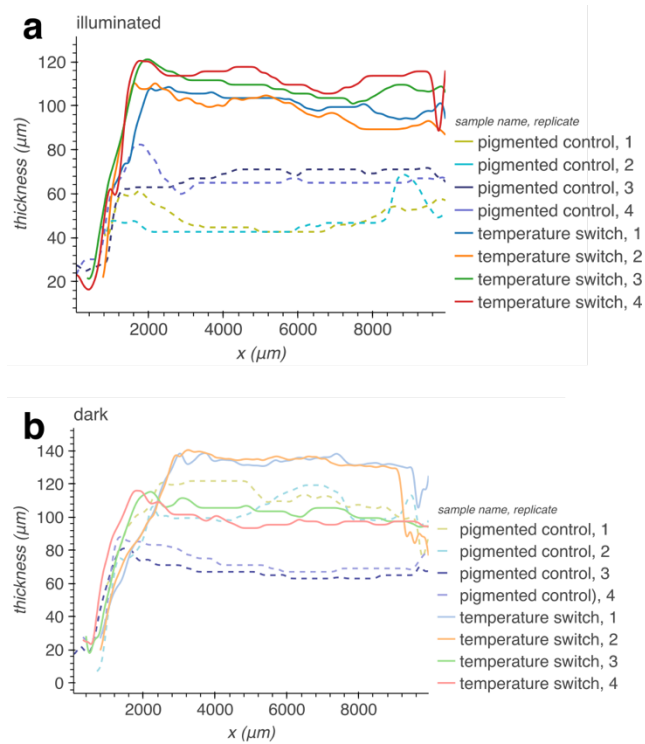

**Supplementary figure S11.** Thicknesses measured across full OCT cross-section for each patch of *E. coli* containing either the temperature switch construct or a pigmented control construct encoding IPTG-inducible LacZ $\alpha$ , grown at 42°C for 48 h with **(a)** or without **(b)** illumination. Replicates 1 and 2 for both the pigmented control and the temperature switch construct were coated on Whatman Nuclepore polycarbonate membranes. Replicates 3 and 4 were coated on Sartorius polycarbonate membranes.



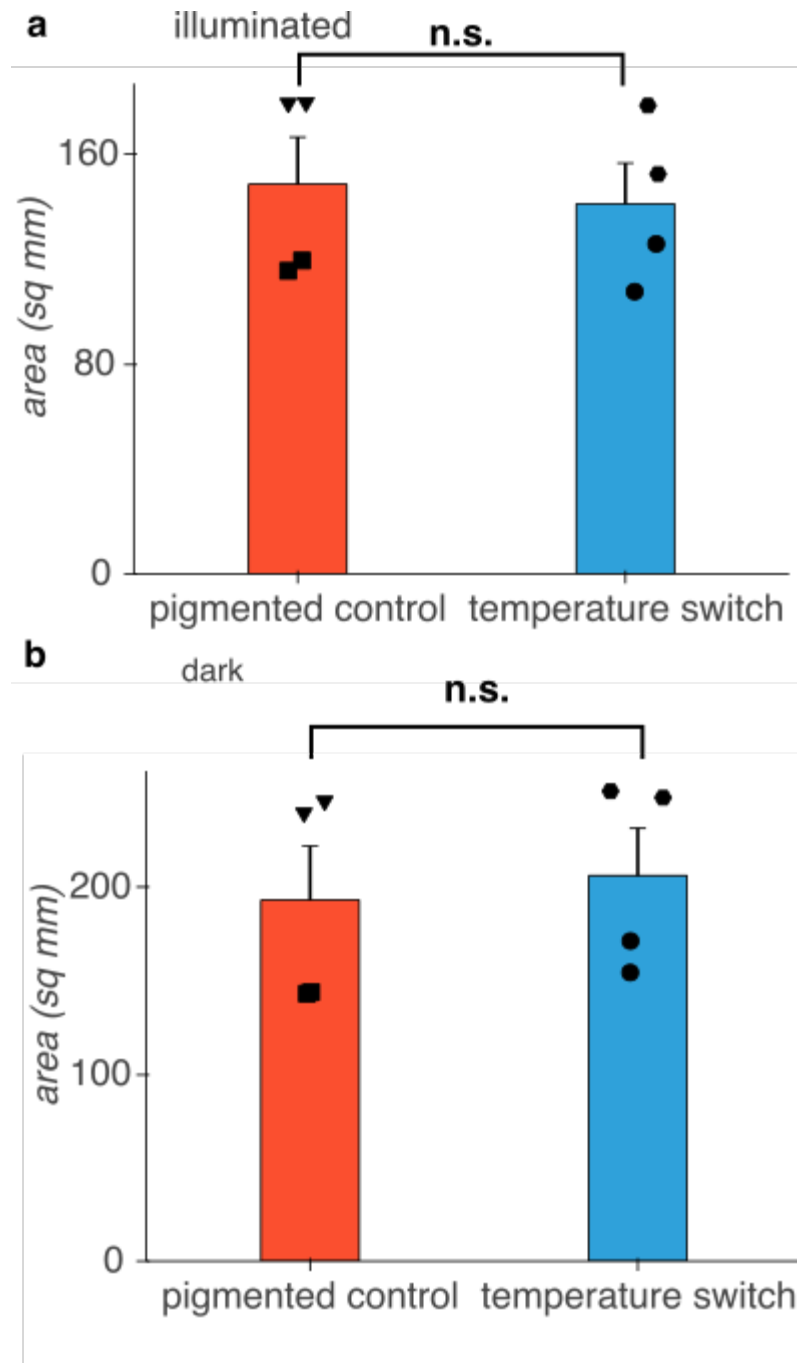

**Supplementary figure S12.** Area of patches of *E. coli* containing either the temperature switch construct or a pigmented control construct encoding IPTG-inducible LacZ $\alpha$ , grown at 42°C with (a) or without (b) illumination for 48 h. Inverted triangle and hexagon markers indicate patches coated onto Whatman Nucleopore polycarbonate membranes; square and circle markers indicate patches coated onto Sartorius polycarbonate membranes.

**a**

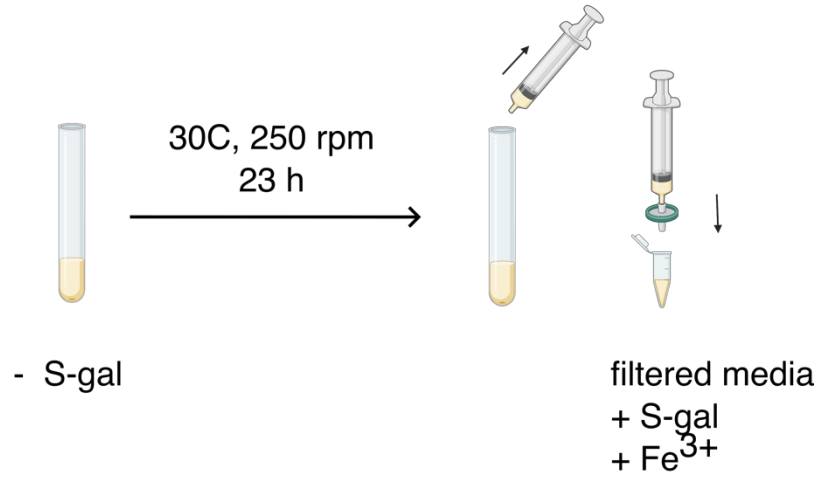

**b**

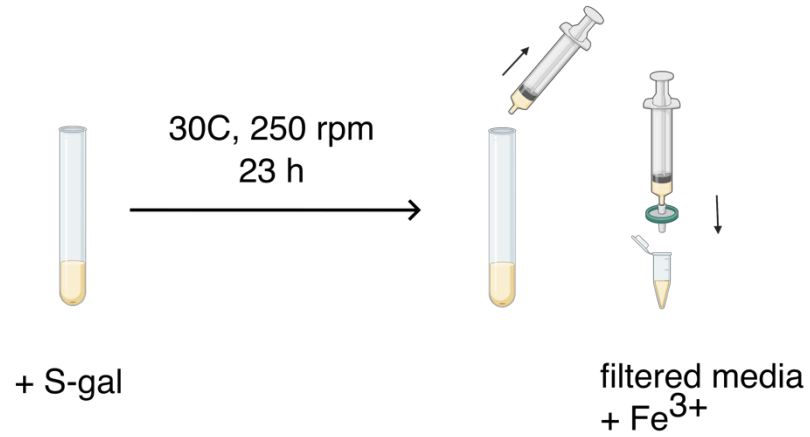

**c**

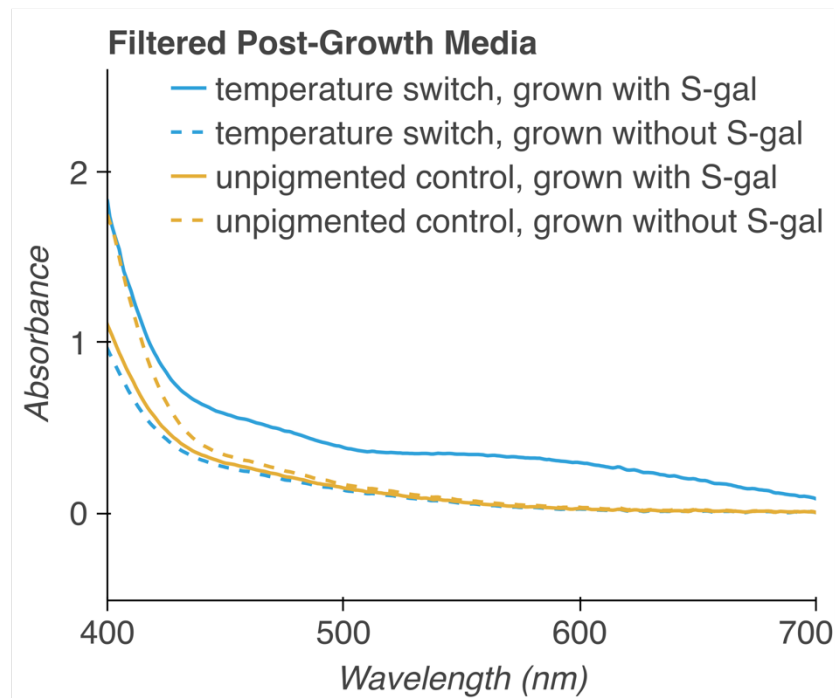

**Supplementary figure S13.** Enzymatic cleavage of S-gal occurs intracellularly before extracellular coordination with ferric iron to form pigment. **(a)** DH10B *E. coli* were grown in LB media supplemented with 100 µg/mL ampicillin at 30°C, 250 rpm for 23 h. The cultures were passed through a 0.22 µm filter to remove the cells; then, 300 µg/mL S-gal and 500 µg/mL ferric ammonium citrate were added to the filtered media. **(b)** DH10B *E. coli* were grown in LB media supplemented with 100 µg/mL ampicillin and 300 µg/mL S-gal at 30°C, 250 rpm for 23 h. The cultures were passed through a 0.22 µm filter to remove the cells; then, 500 µg/mL ferric ammonium citrate were added to the filtered media. **(c)** Visible light optical density spectra of cultures of *E. coli* 1 h after filtering and adding either S-gal or S-gal and ferric ammonium citrate. The temperature switch sample grown with S-gal exhibits increased optical density from 450 nm to 700 nm compared with the unpigmented control sample grown with and without S-gal and the temperature switch sample grown without S-gal. This suggests that β-galactosidase cleaves S-gal intracellularly and at least some of the cyclohexenoesuletin product is exported from the cell, where it coordinates with ferric iron to form the light-absorptive pigment. Spectra measured using a NanoDrop 2000/2000c Spectrophotometer (ThermoFisher) in cuvette mode. Constructs differ from main text slightly: Unpigmented control encodes nonfluorescent mWasabi mutant under the control of TlpA (TlpA represses product at 30°C). Pigmented control encodes IPTG-inducible full-length LacZ. Temperature switch construct lacks AAV ssrA tag on LacZα.
